# Supplementary material for: Future Antarctic bed topography and its implications for ice sheet dynamics
Source: Copernicus journal article supplement (doi:10.5194/se-5-569-2014), 2014-06-30
Supplement: Supplementary file 2 [file se-5-569-2014-supplement.zip]

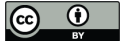

## *Supplement of*

# **Future Antarctic bed topography and its implications for ice sheet dynamics**

*Correspondence to:* S. Adhikari (surendra.adhikari@jpl.nasa.gov)

- Supplement-Cover-Letter.pdf
- 2-supplementaryMaterials
  - .DS\_Store
  - Adhikari\_SE\_Supplementary.pdf
  - Adhikari\_SE\_Supplementary.tex
  - FigureS1.pdf
  - FigureS1\_inset.pdf
  - FigureS2.pdf
  - FigureS3a.pdf
  - FigureS3b.pdf
  - FigureS4.pdf
  - FigureS5.pdf
  - FigureS6.pdf
  - FigureS7.pdf
  - FigureS8.pdf
  - copernicus.bst
  - references.bib
- \_\_MACOSX
  - 2-supplementaryMaterials
    - \* .\_DS\_Store
    - \* .\_Adhikari\_SE\_Supplementary.tex
    - \* .\_FigureS1.pdf
    - \* .\_FigureS2.pdf
    - \* .\_FigureS8.pdf
    - \* .\_references.bib
