# Supplementary figures and images for: Future Antarctic bed topography and its implications for ice sheet dynamics
Source: Copernicus journal article supplement (doi:10.5194/se-5-569-2014), 2014-06-30

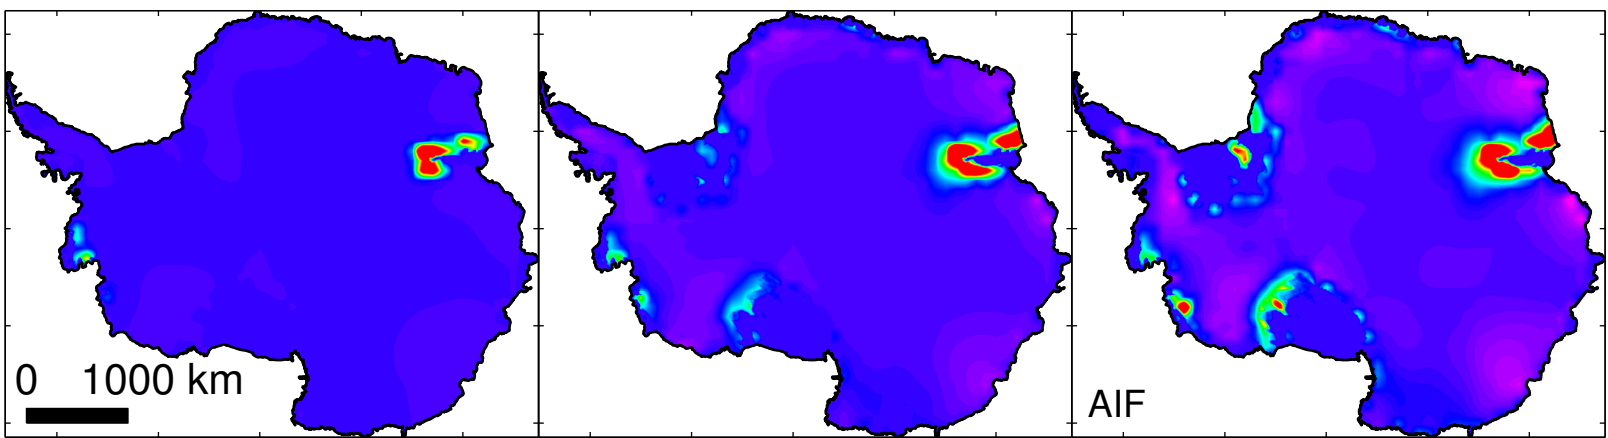

Supplement: Supplementary file 1 [file se-5-569-2014-supplement.zip]

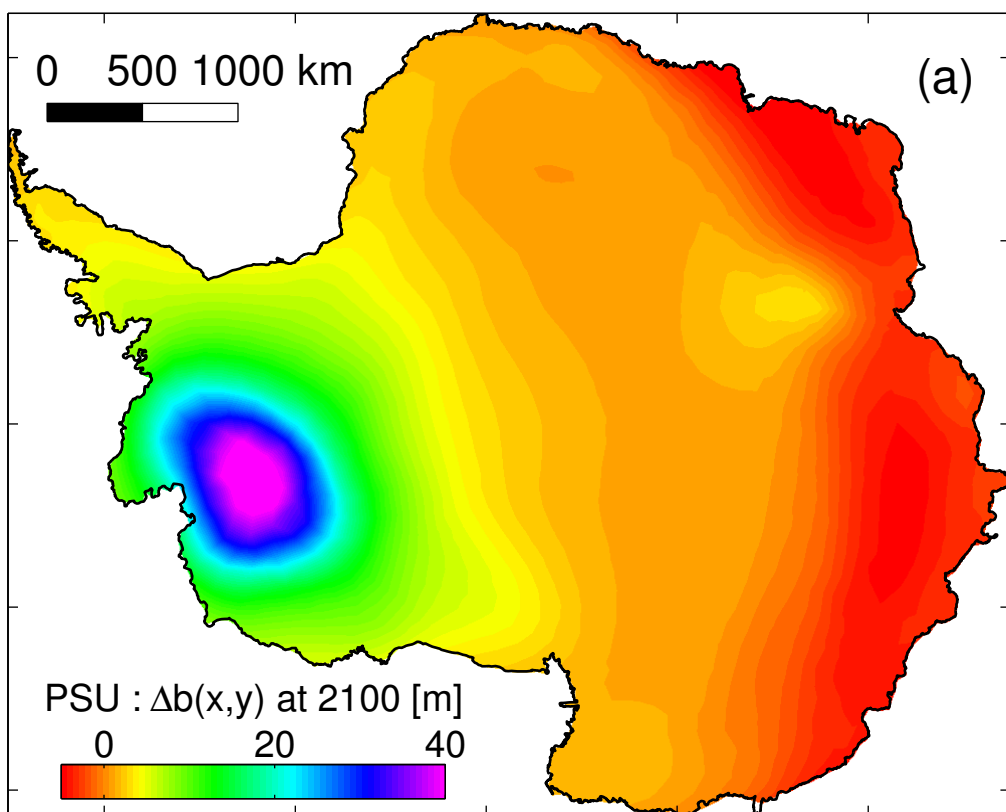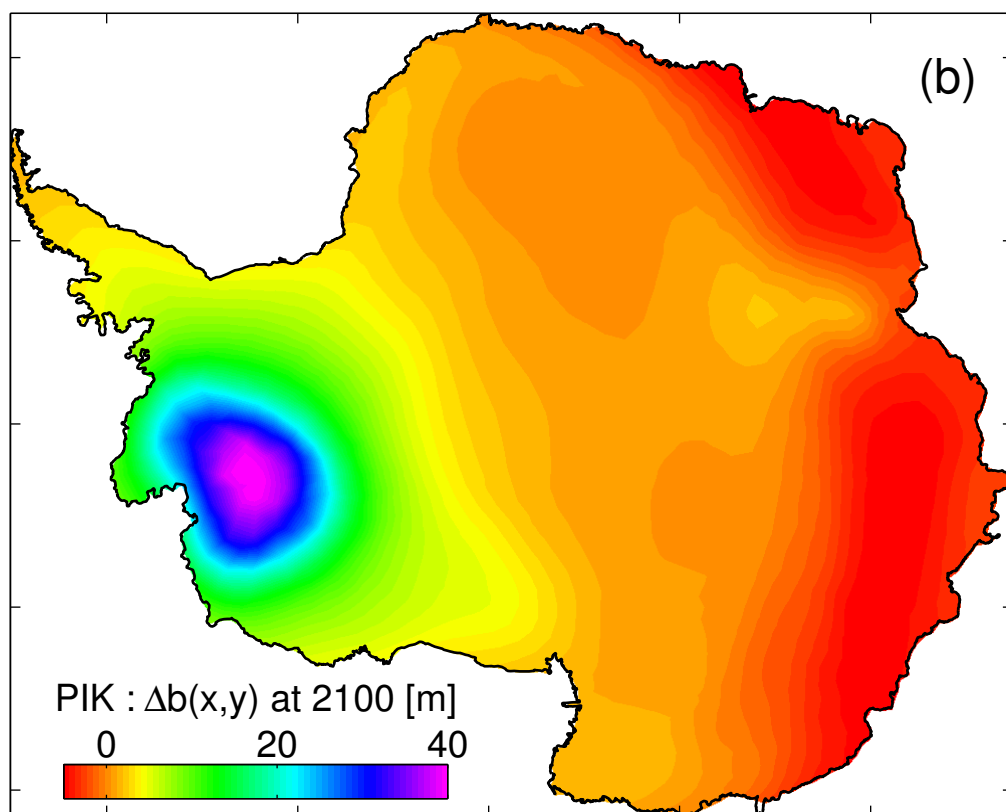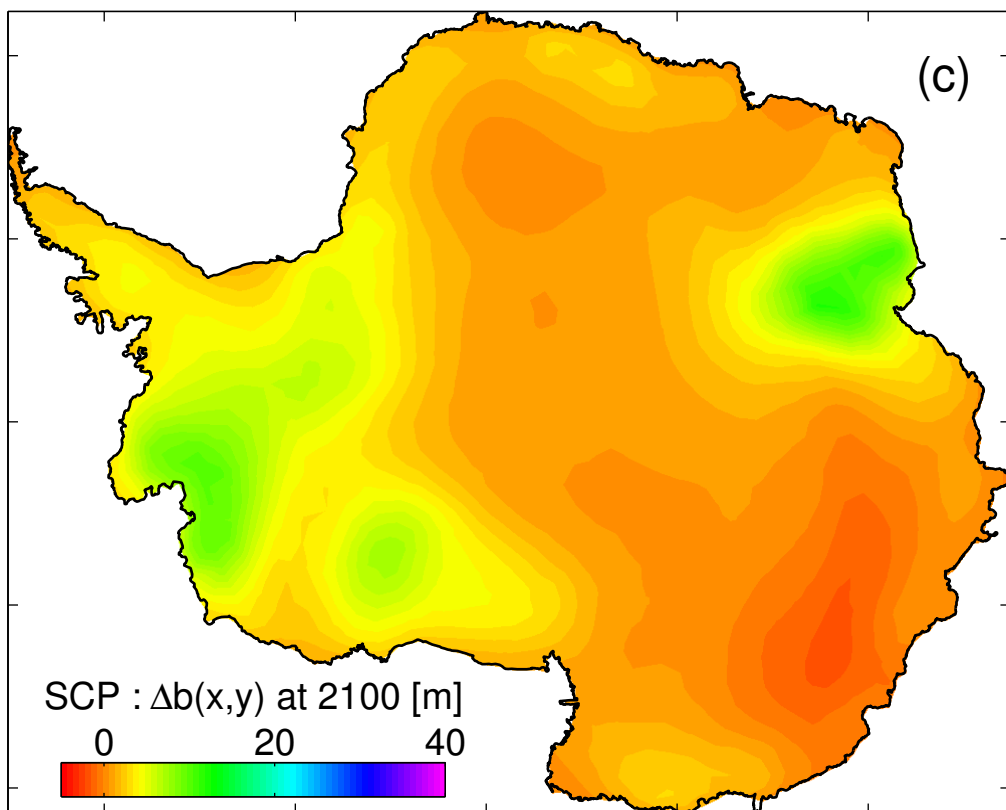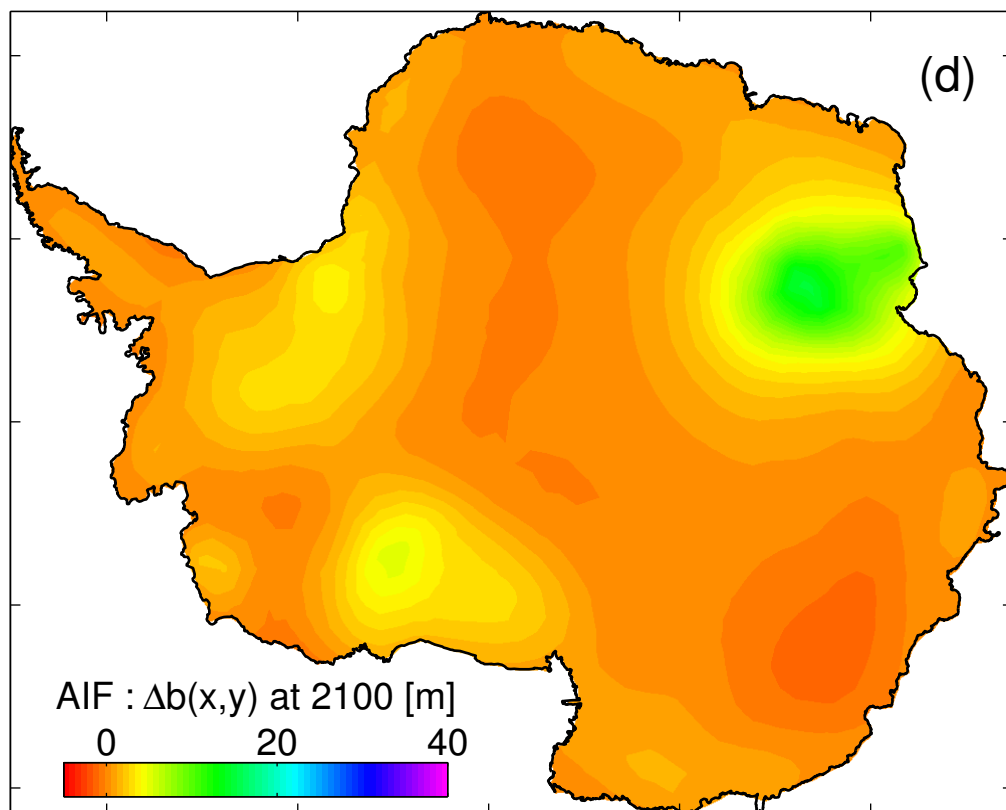

Supplement: Supplementary file 4 [file se-5-569-2014-supplement.zip]

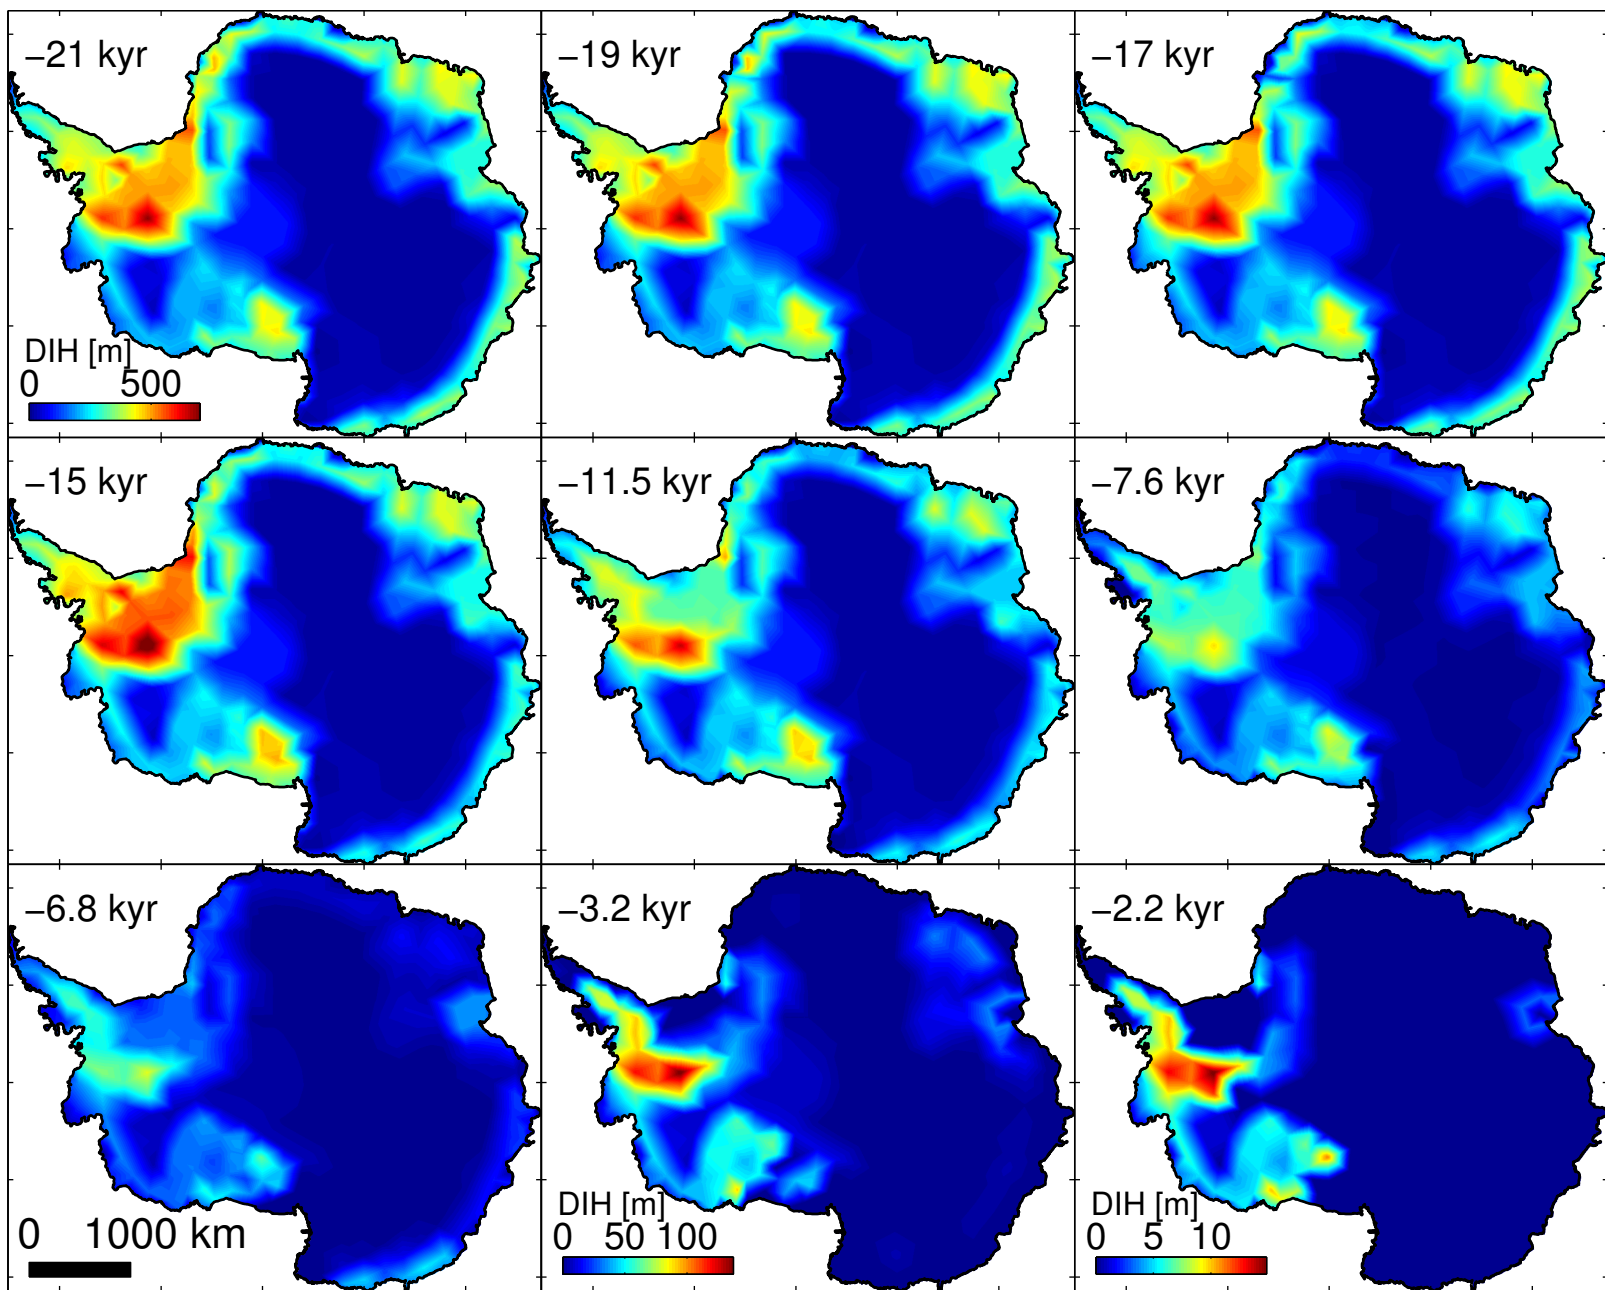

Supplement: Supplementary file 5 [file se-5-569-2014-supplement.zip]

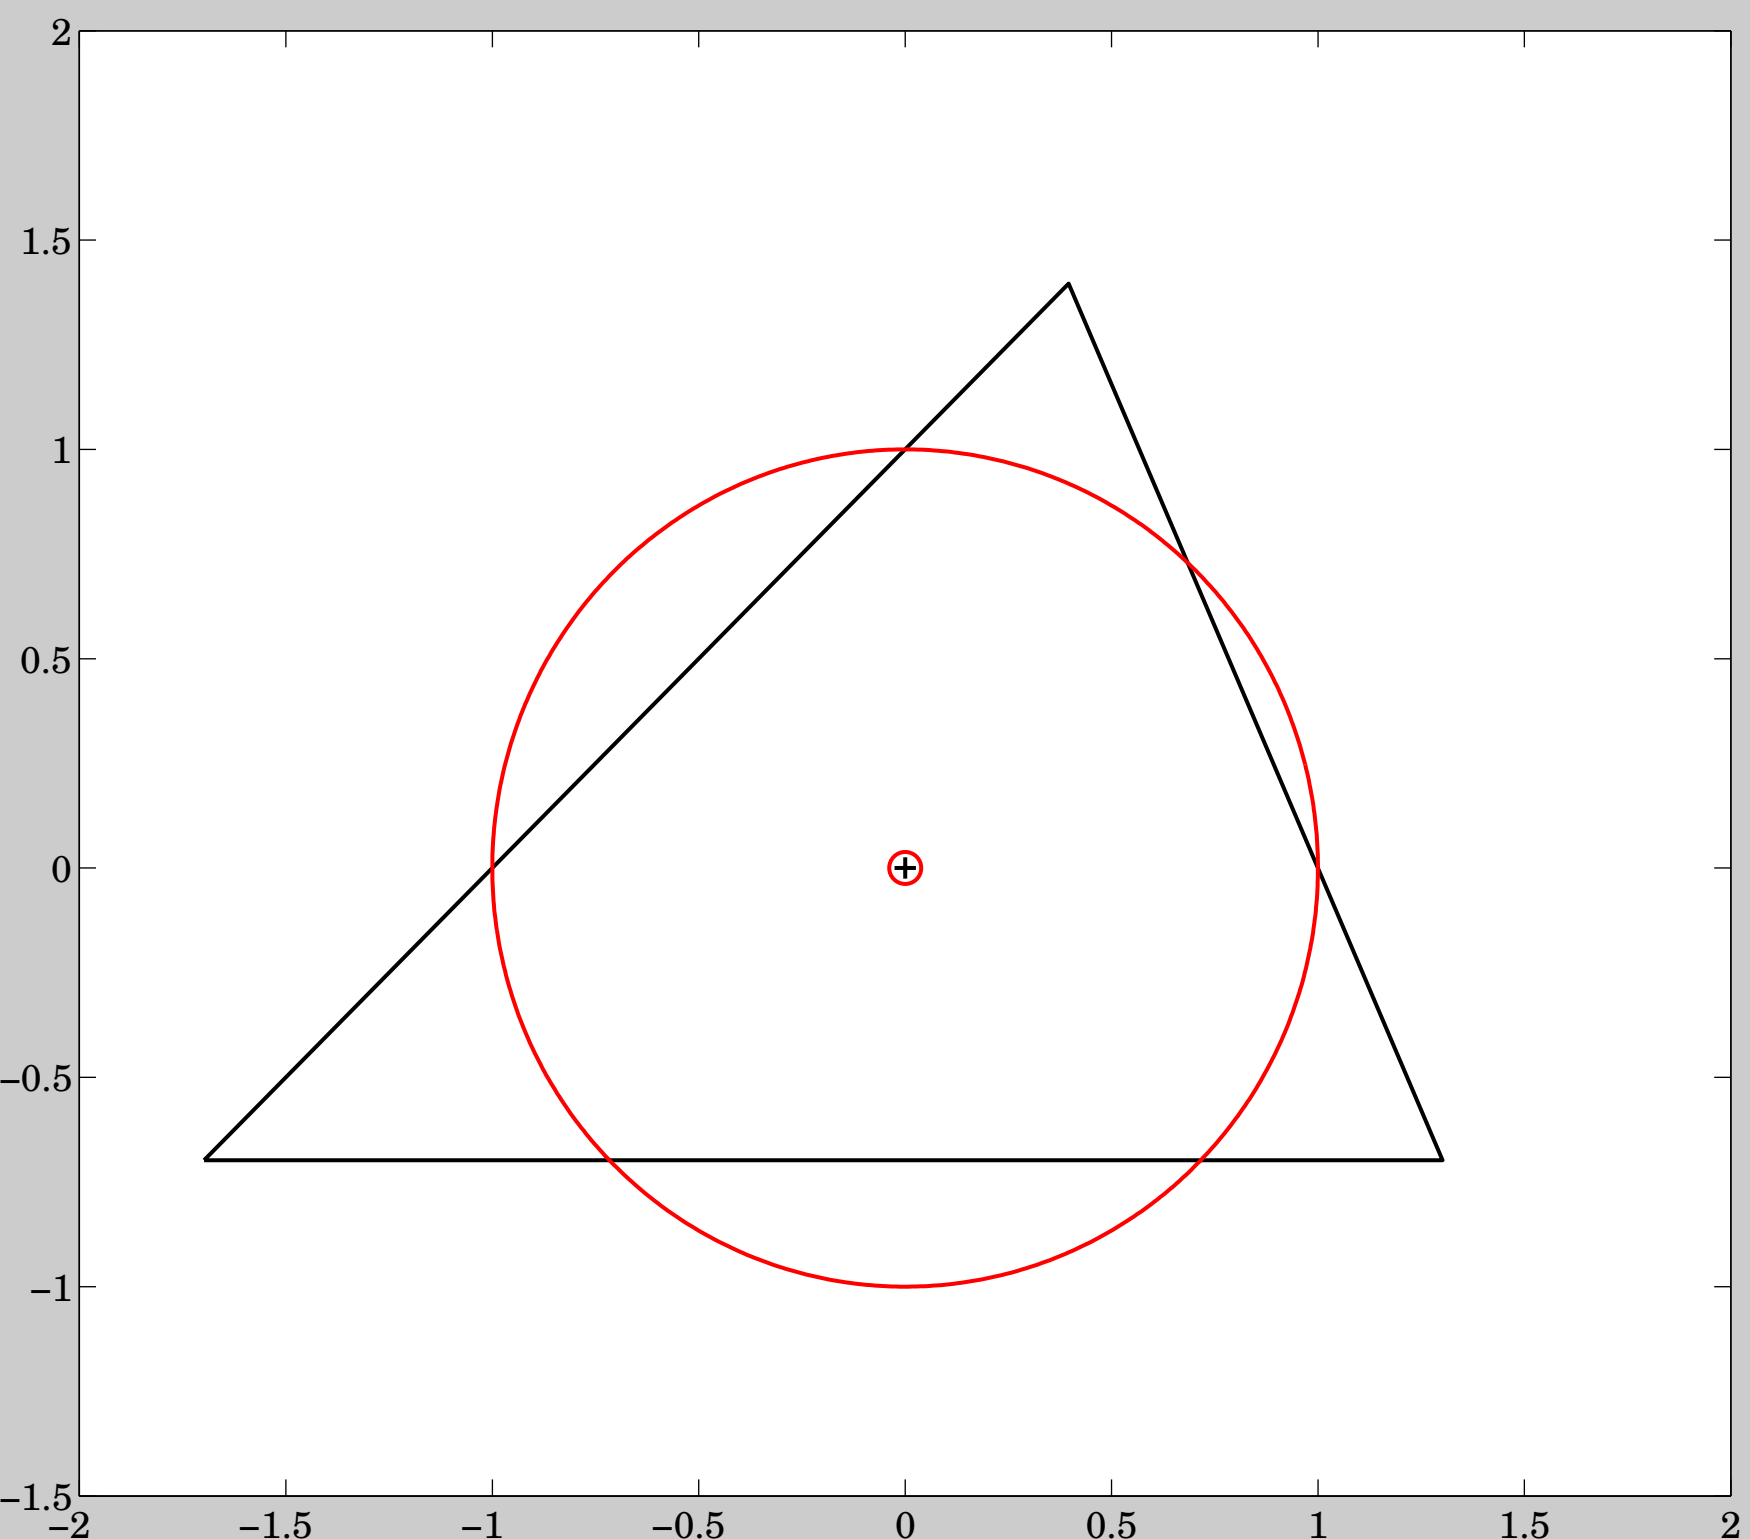

Supplement: Supplementary file 6 [file se-5-569-2014-supplement.zip]

0 500 1000 km

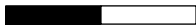

Surface velocity [m/yr]  
0 1000 2000 3000

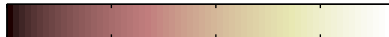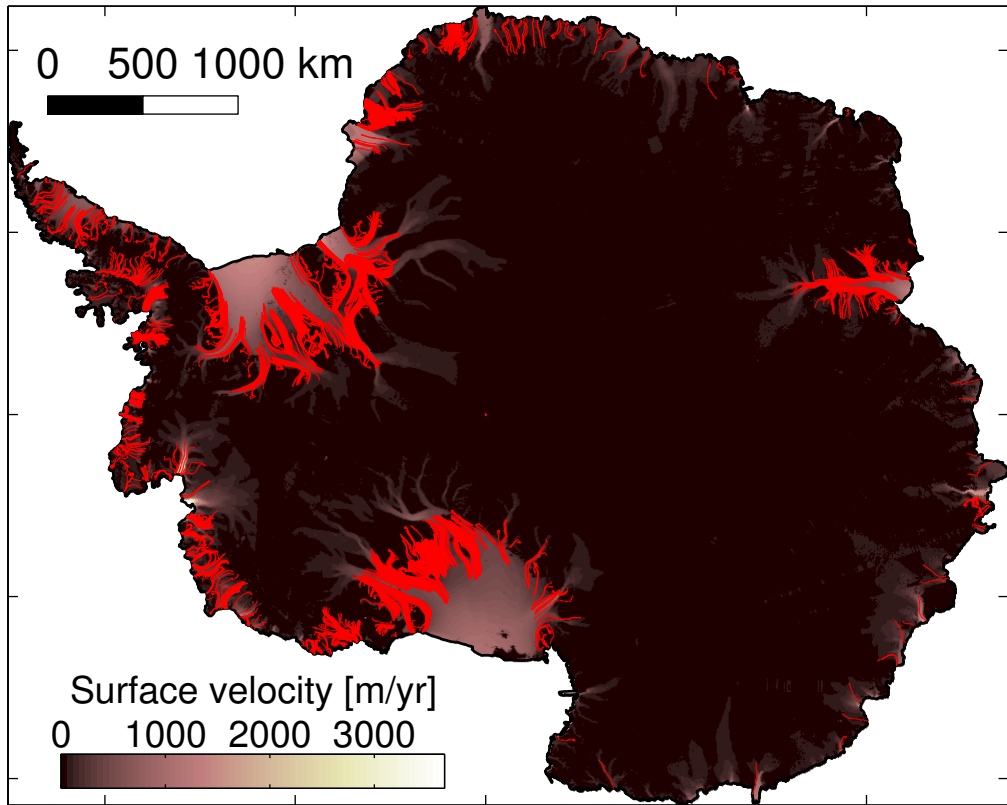

Supplement: Supplementary file 7 [file se-5-569-2014-supplement.zip]

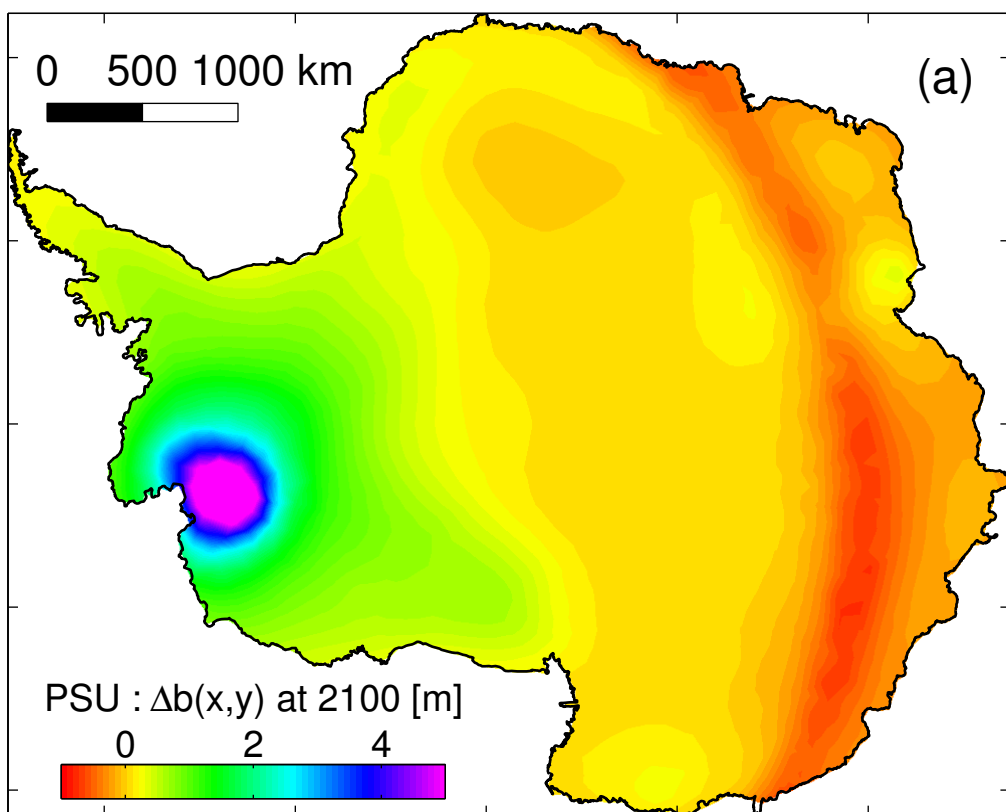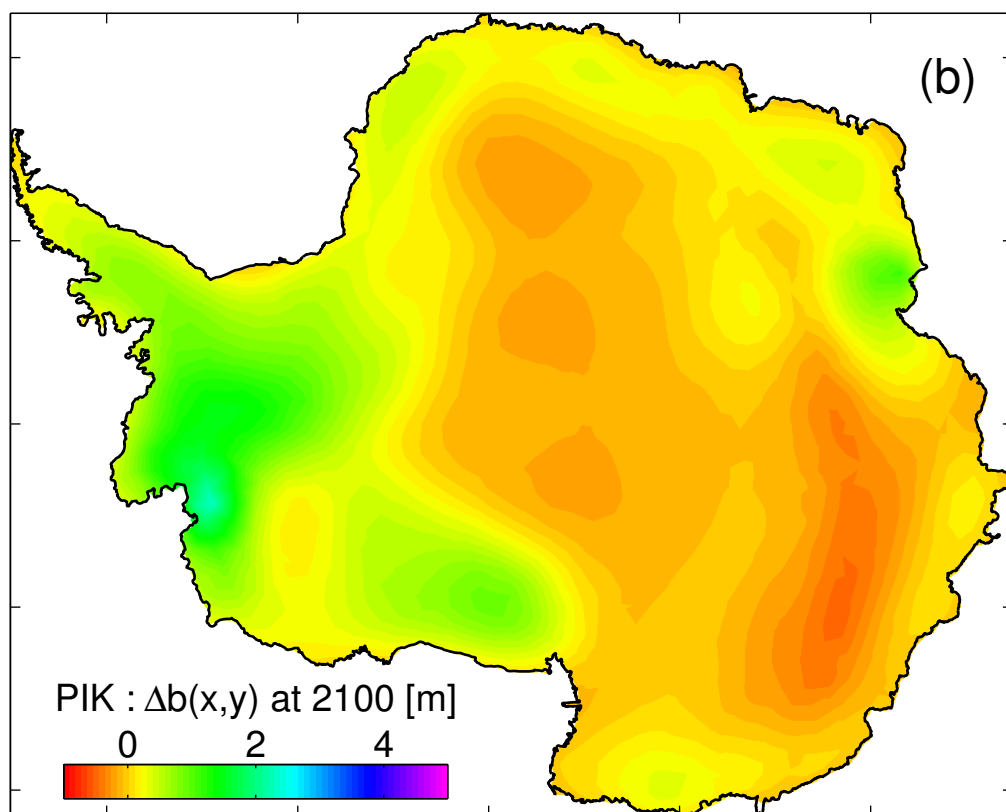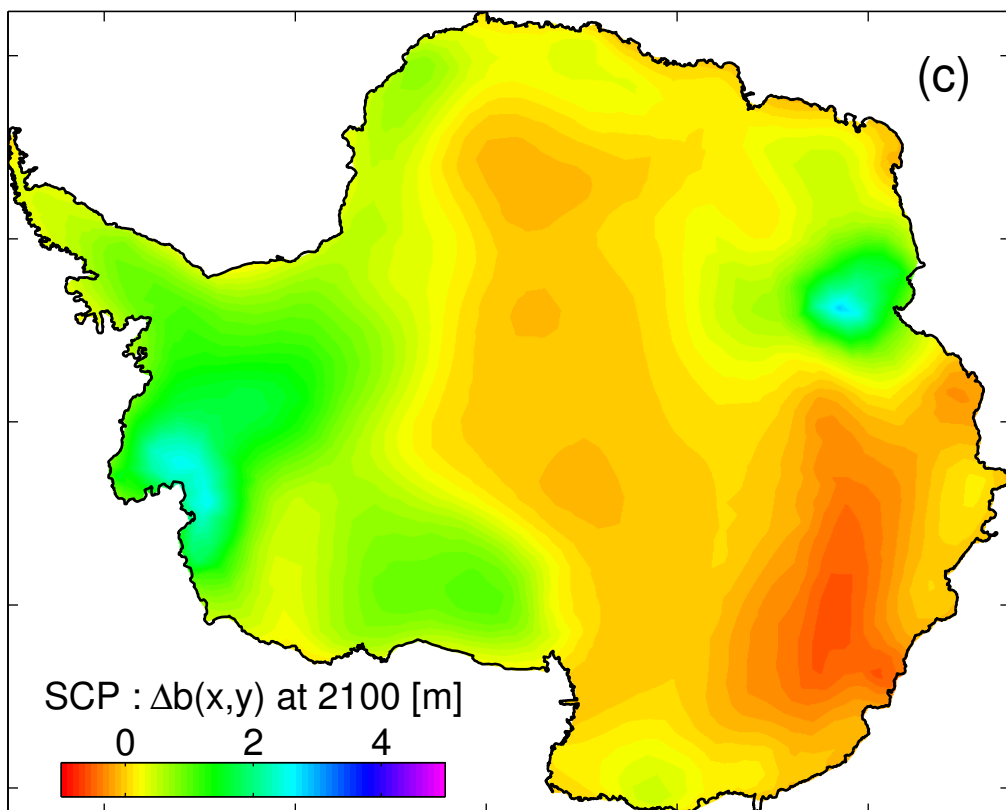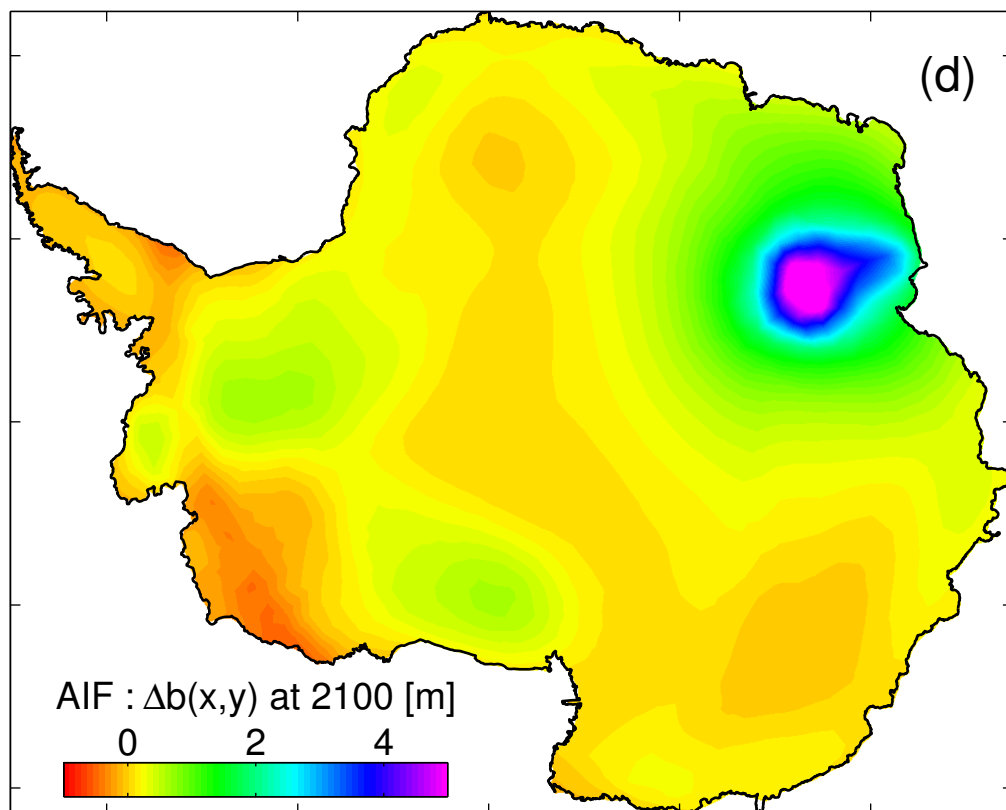

Supplement: Supplementary file 8 [file se-5-569-2014-supplement.zip]

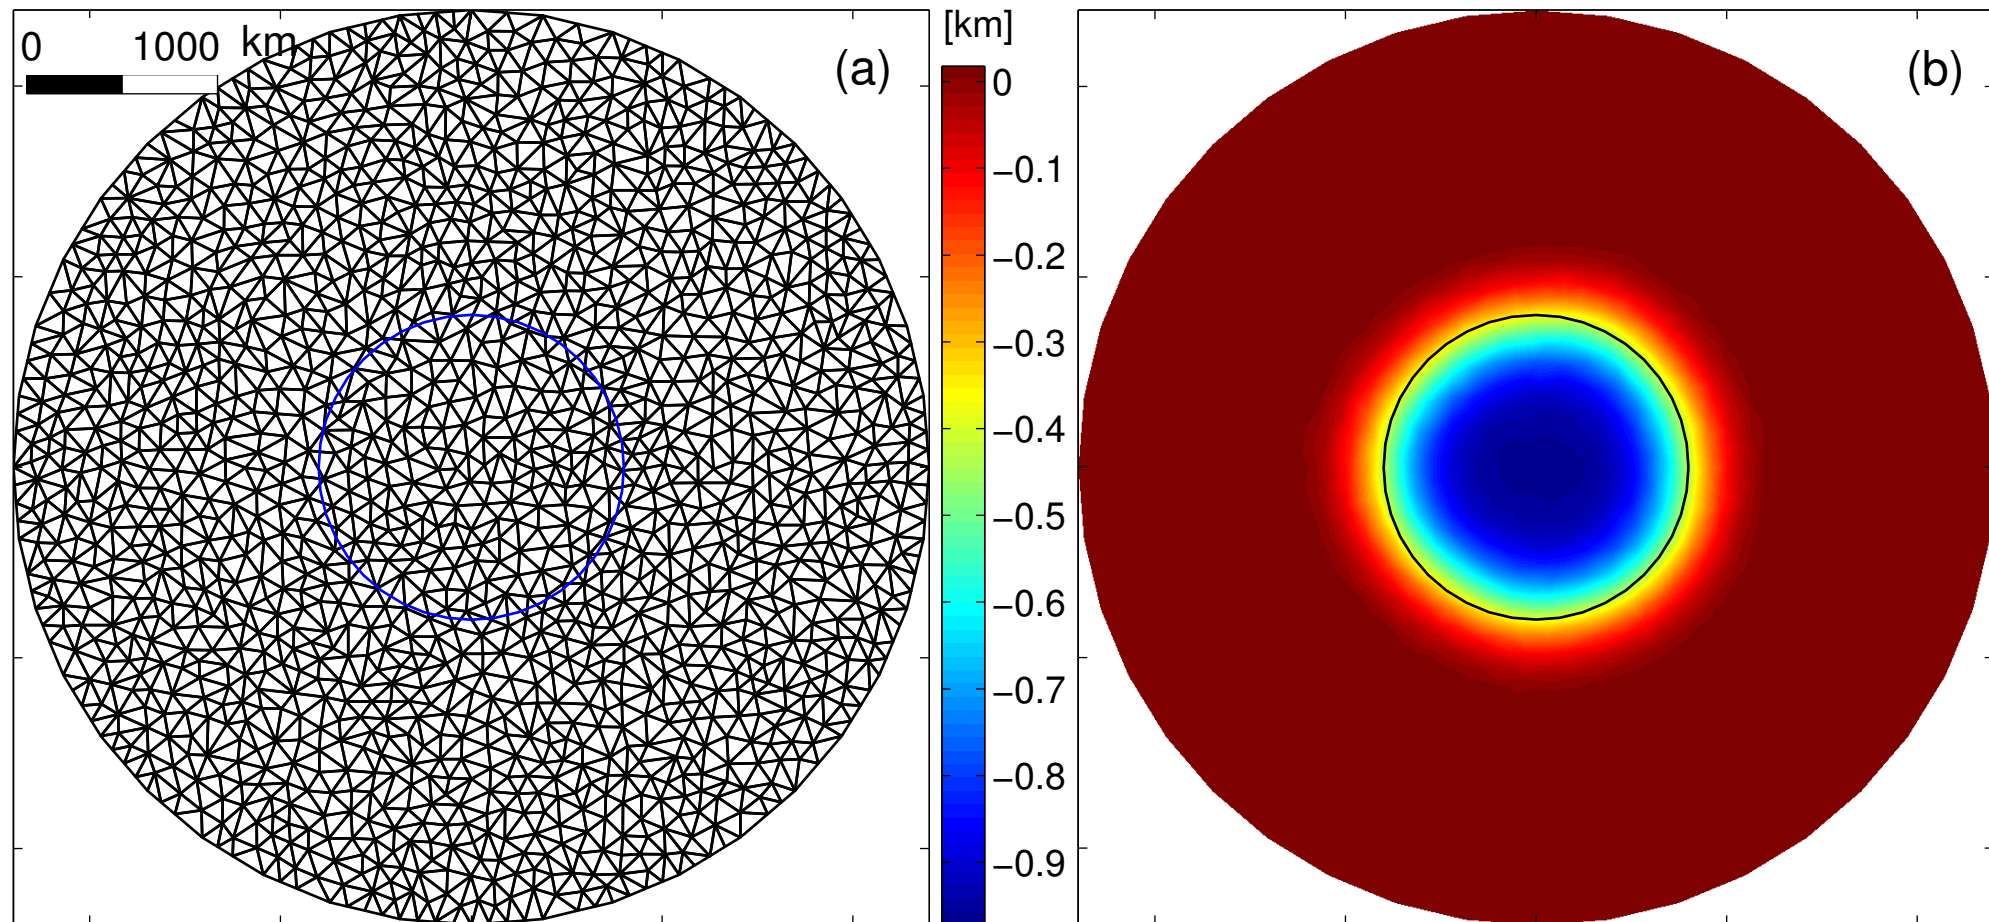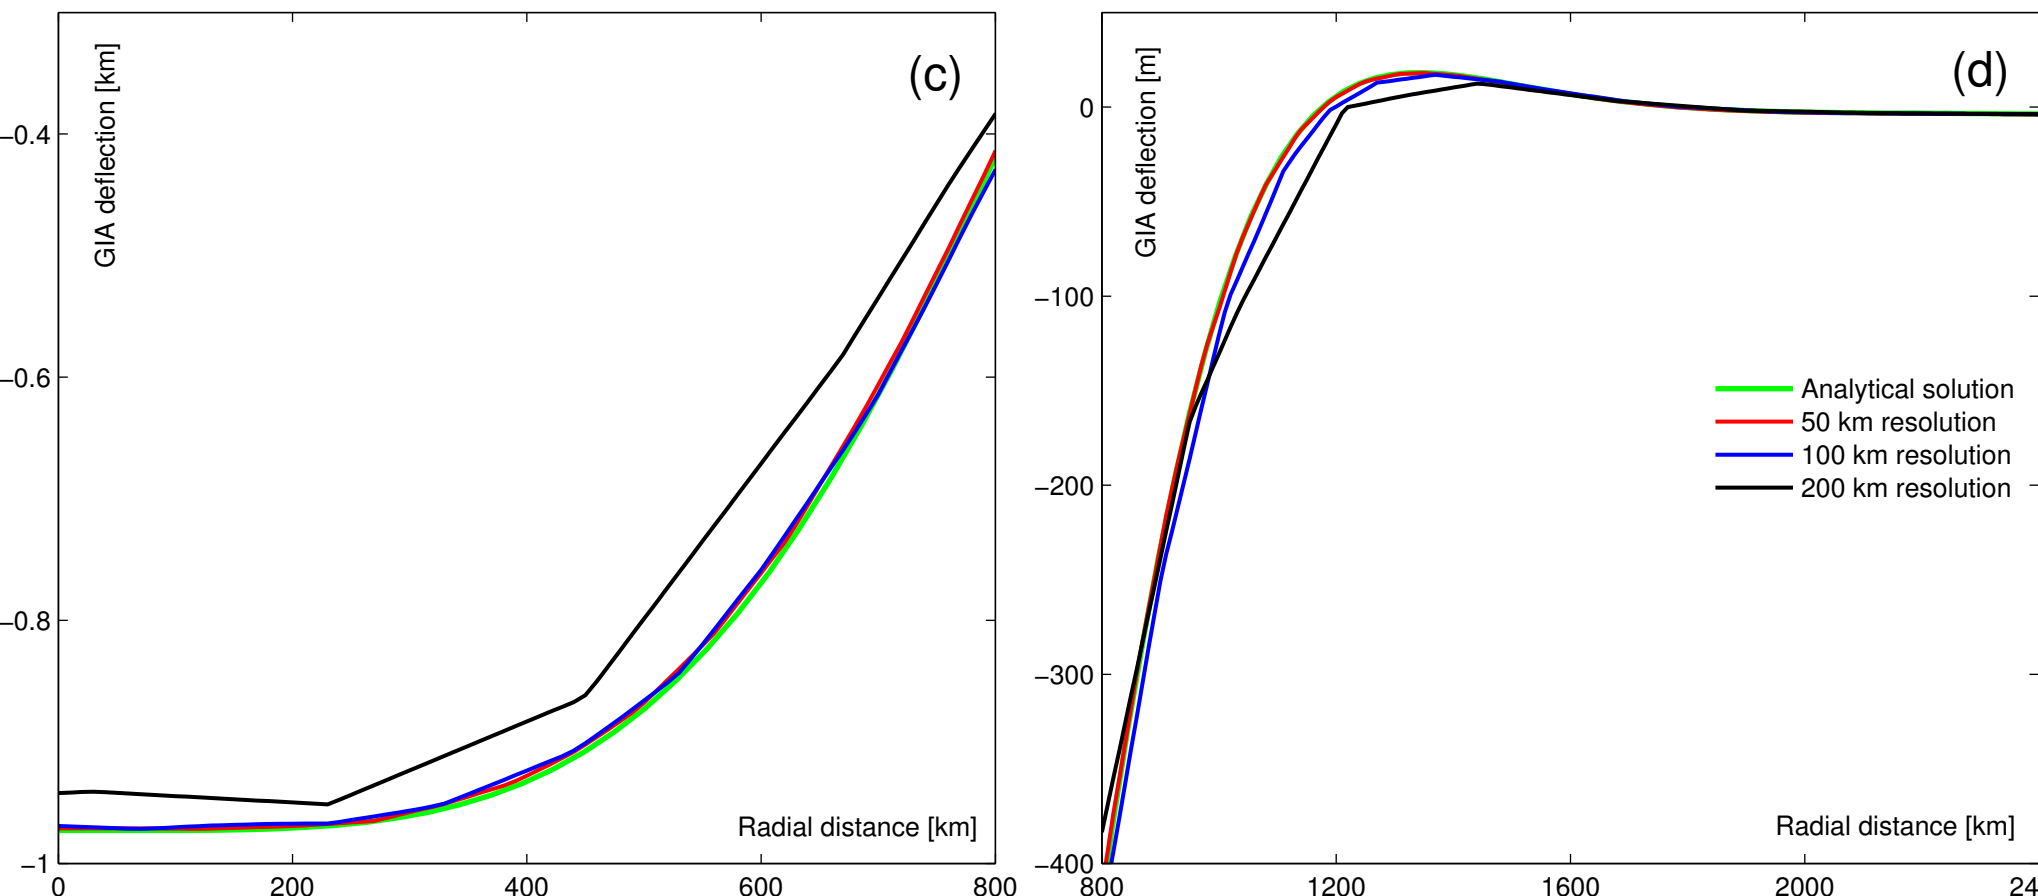

Supplement: Supplementary file 9 [file se-5-569-2014-supplement.zip]

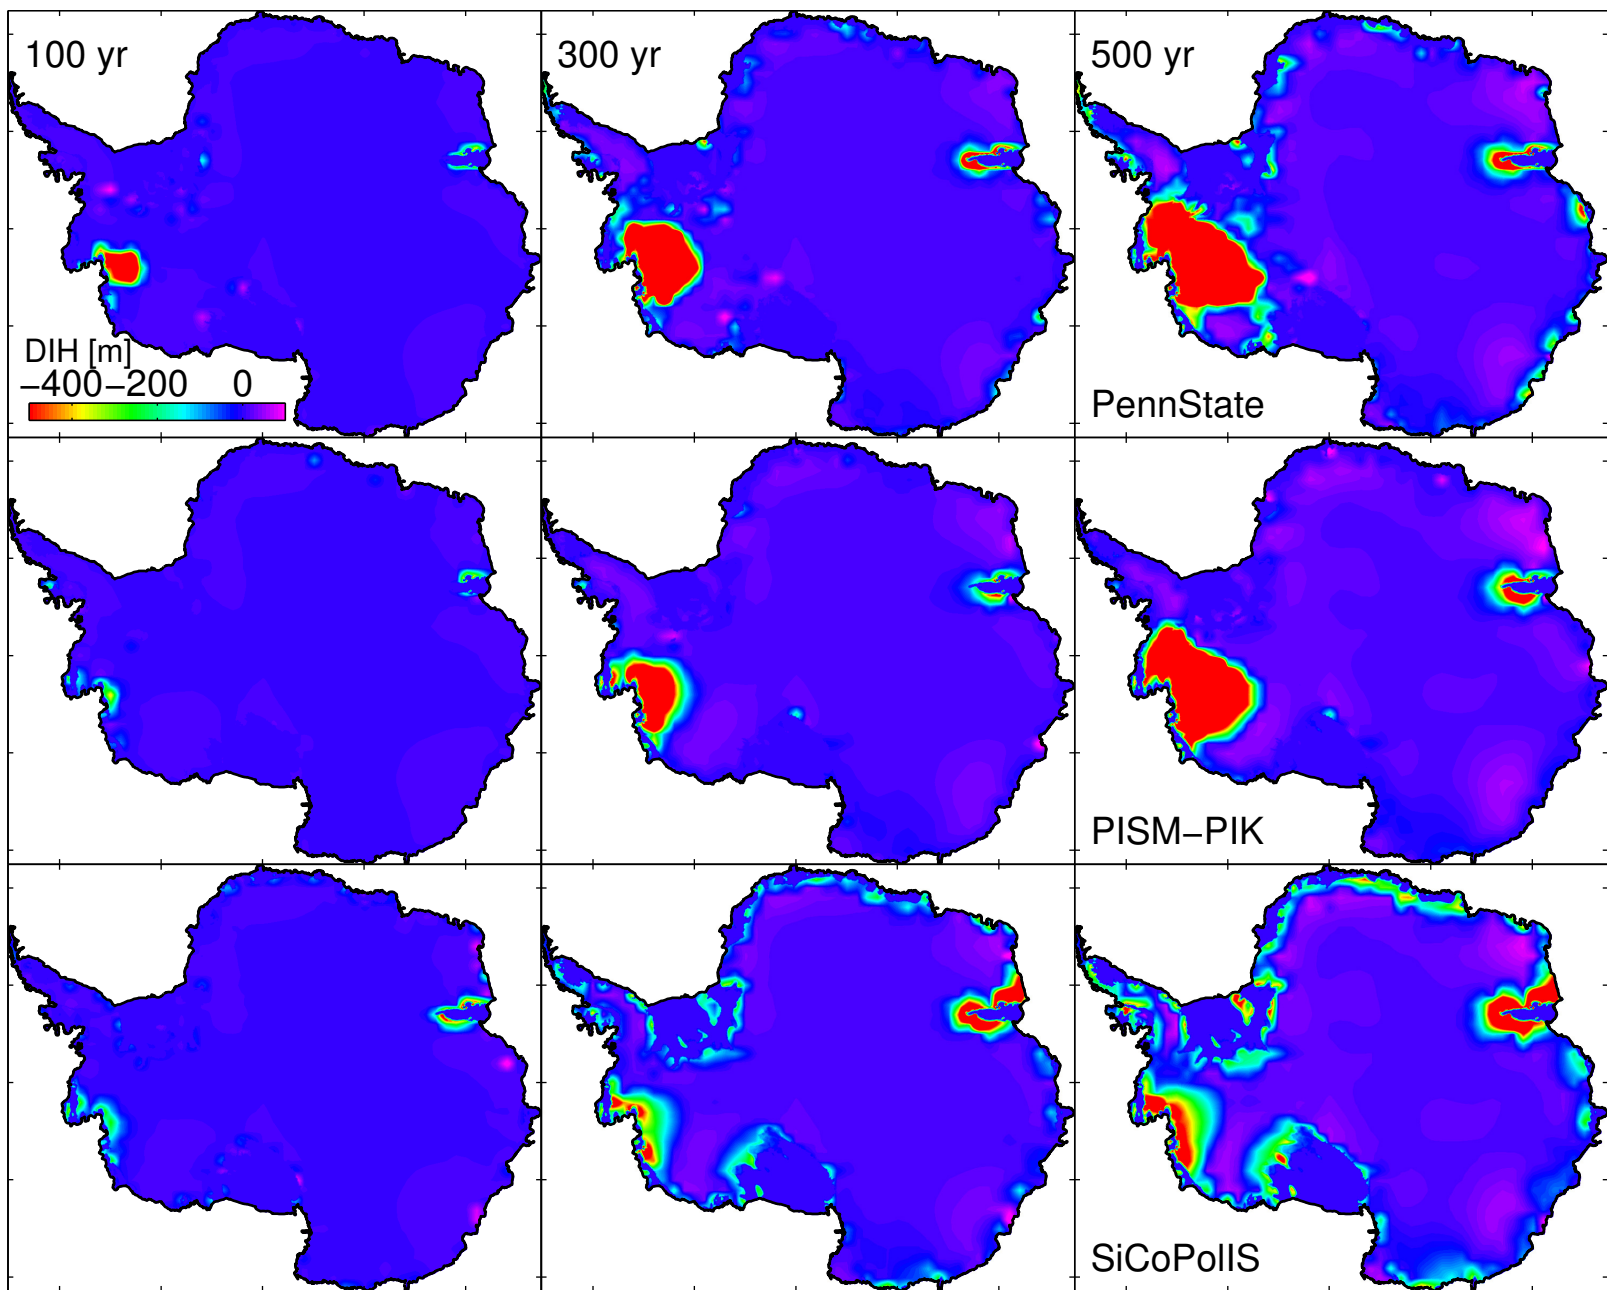

Supplement: Supplementary file 10 [file se-5-569-2014-supplement.zip]

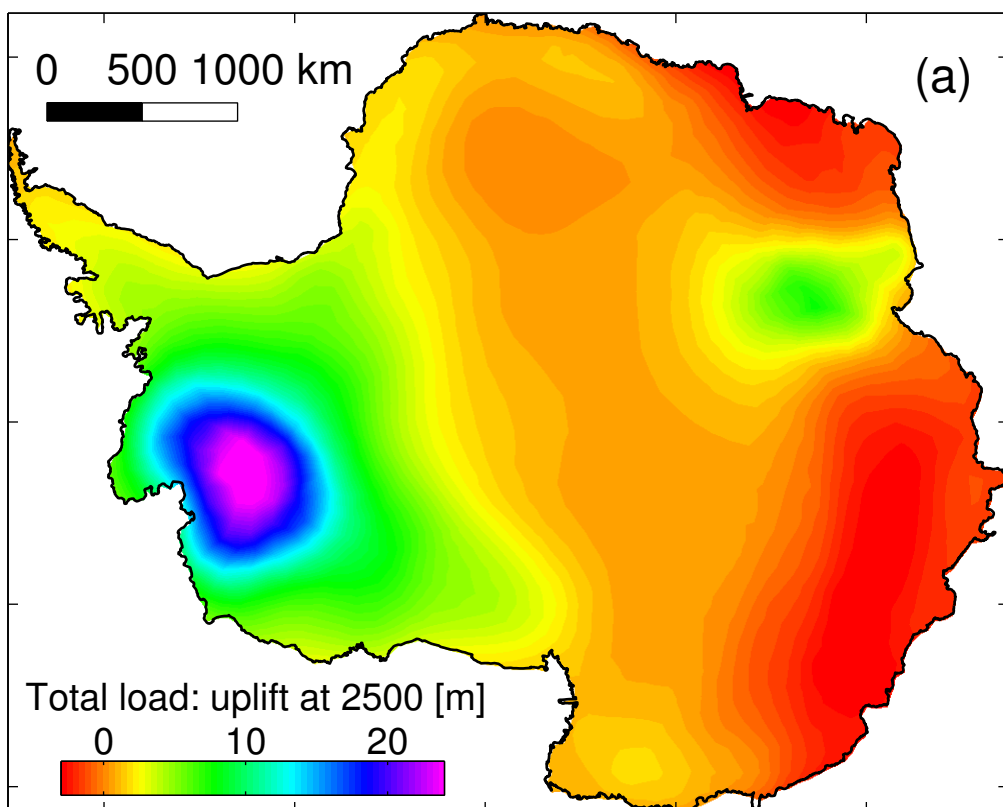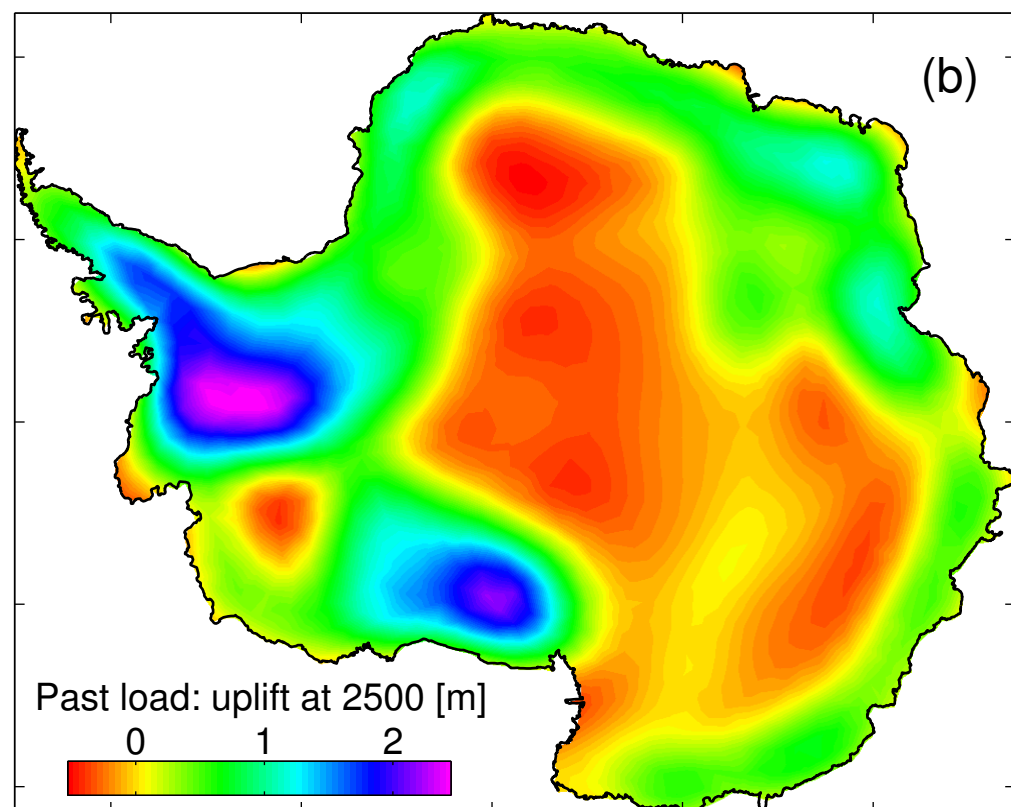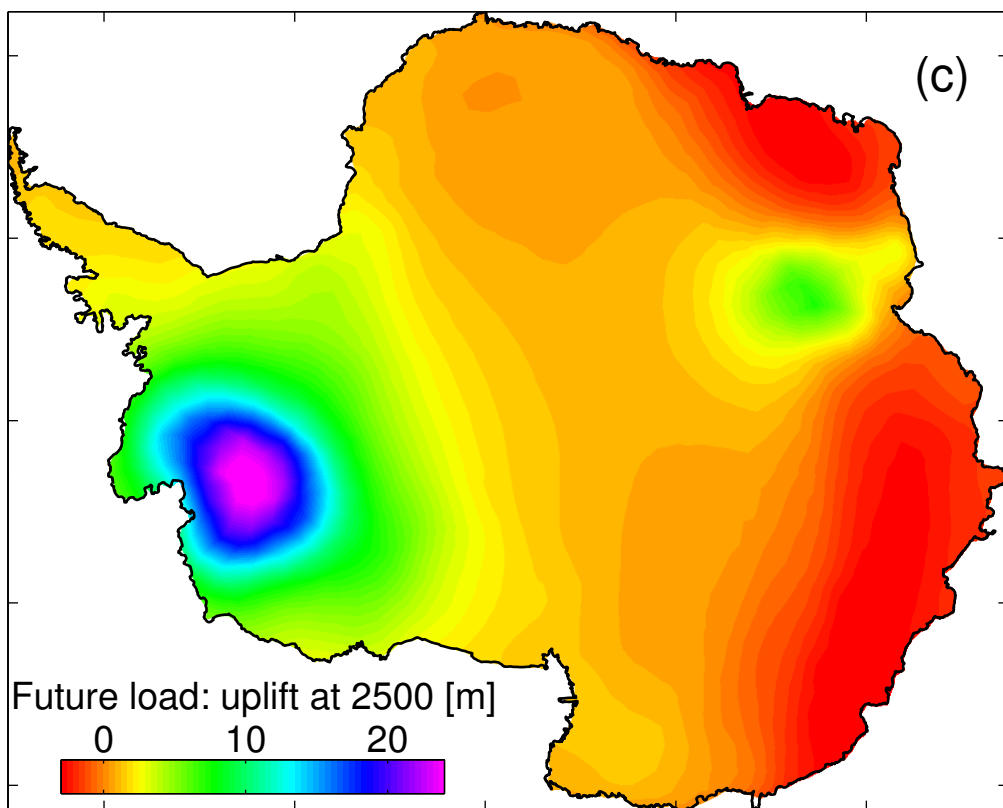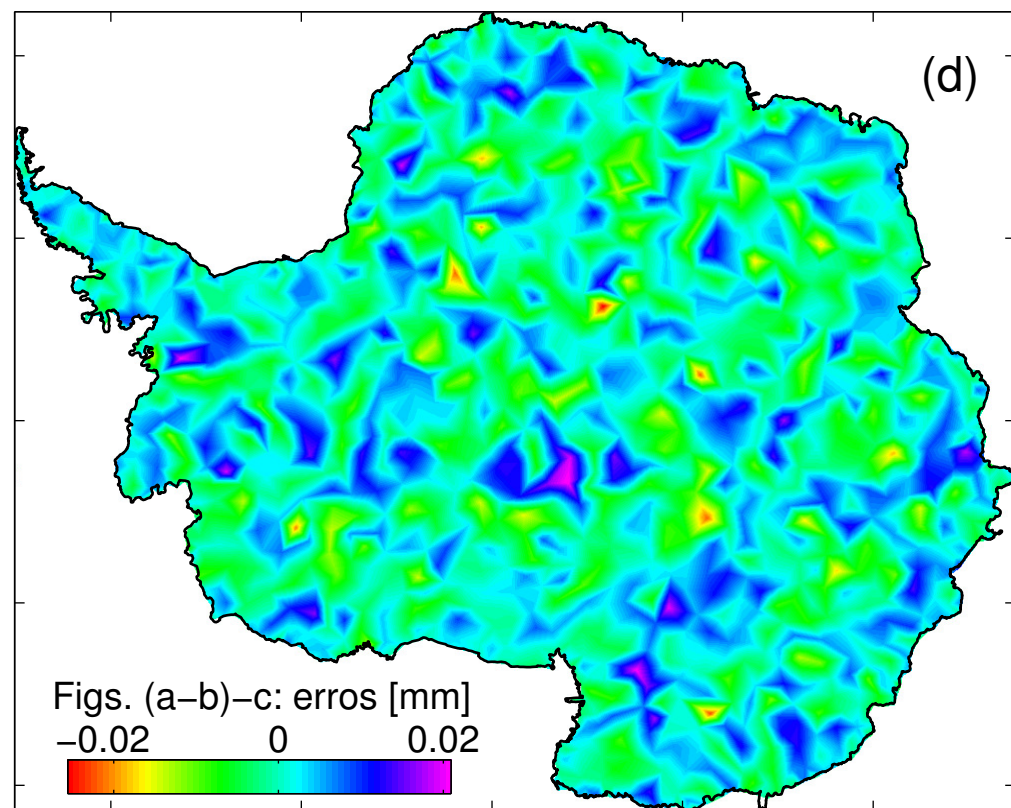

Supplement: Supplementary file 11 [file se-5-569-2014-supplement.zip]

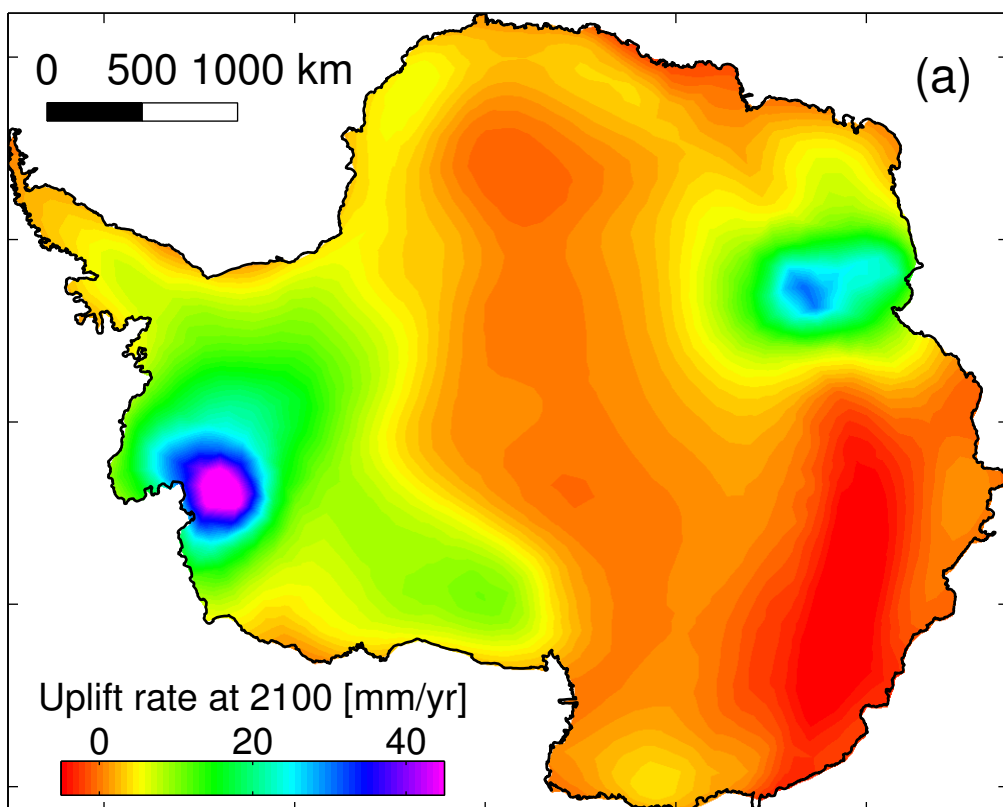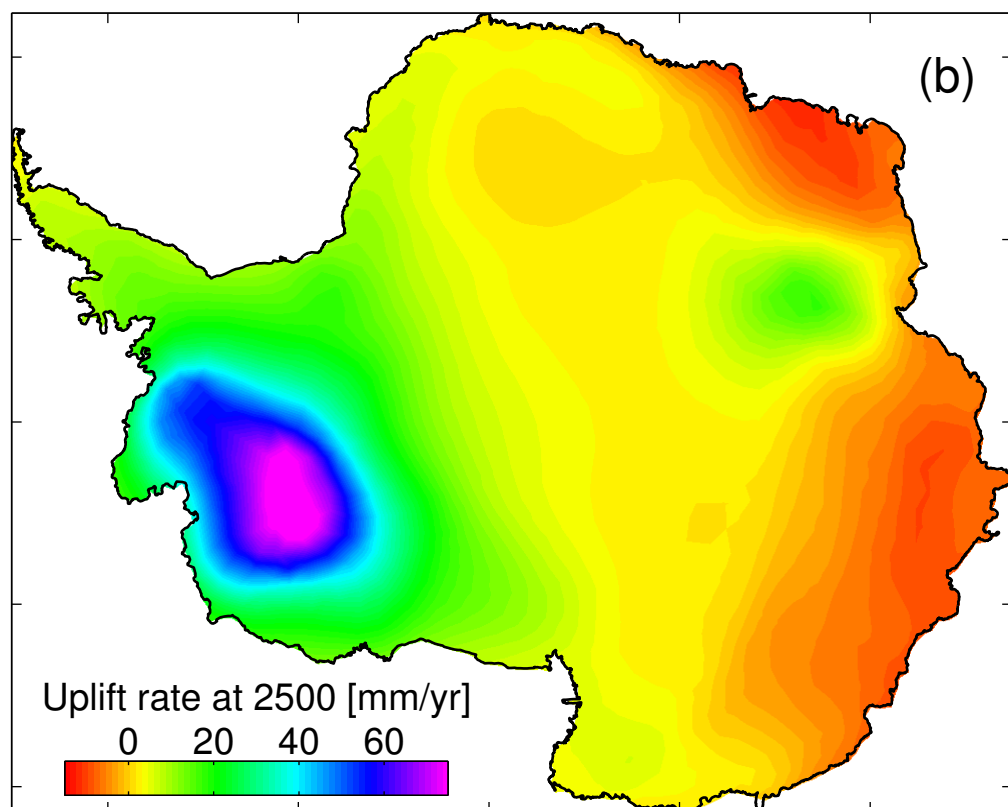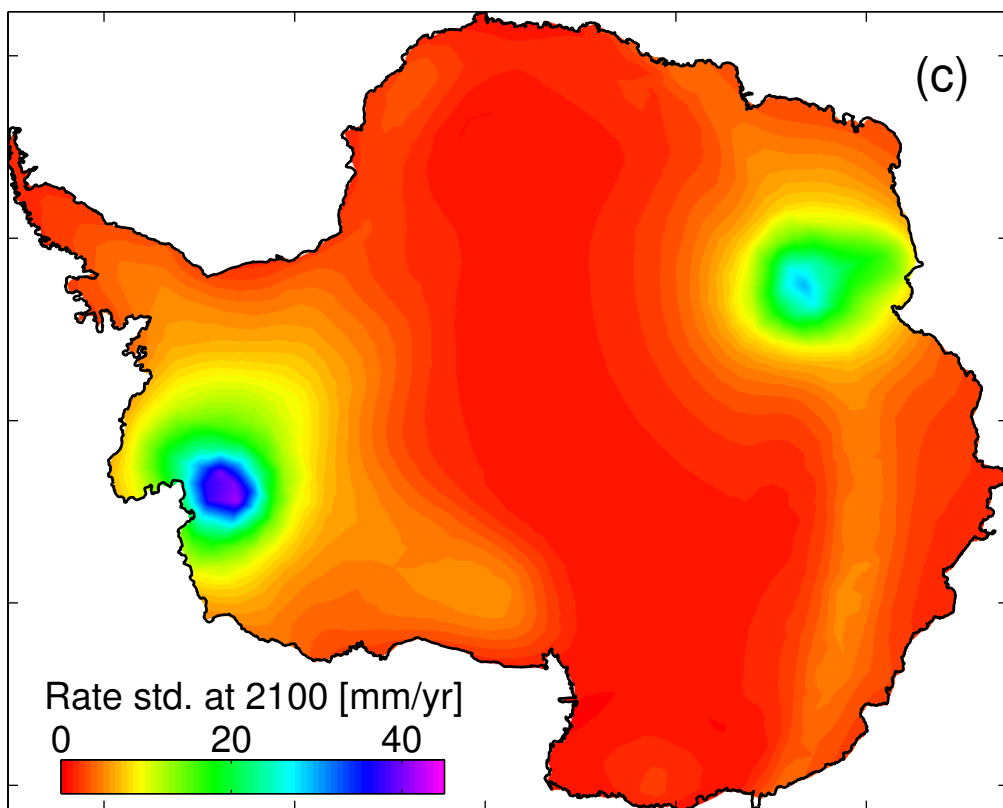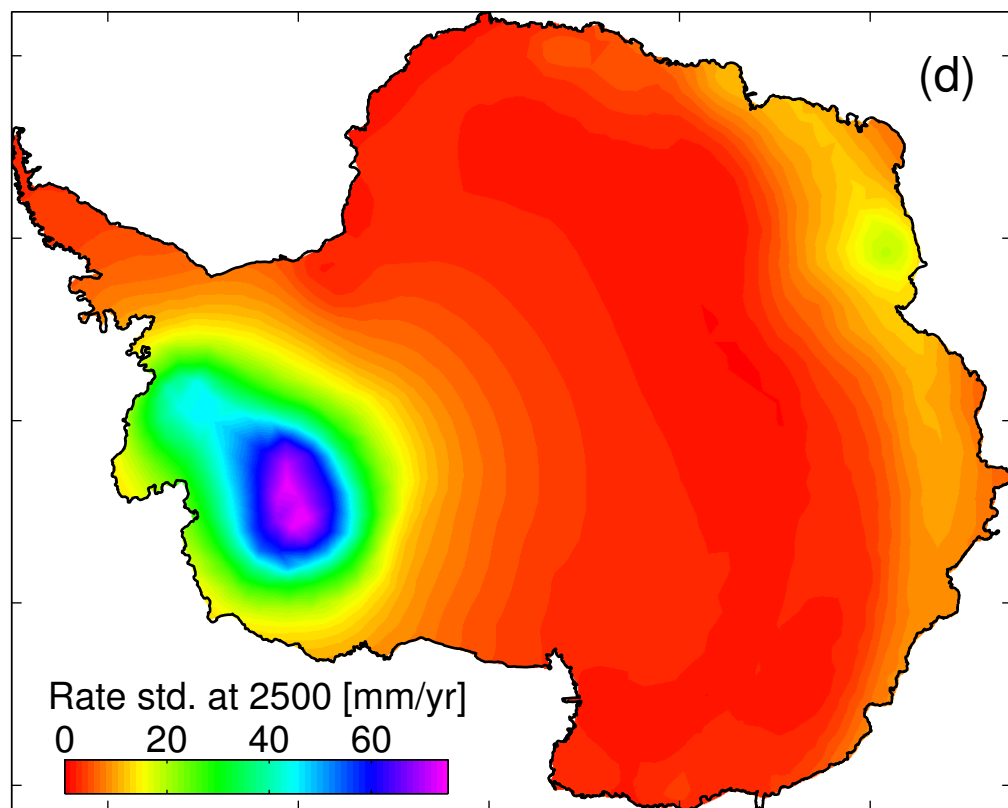

Supplement: Supplementary file 12 [file se-5-569-2014-supplement.zip]
